# Supplementary material for: Hyperosmotic stress induces cell-dependent aggregation of α-synuclein
Source: PubMed Central journal article supplement (PMC6381101; doi:10.1038/s41598-018-38296-7), 2019-02-19

# **Hyperosmotic stress induces cell-dependent aggregation of $\alpha$ -synuclein**

Alexandra M C Fragniere, Simon R W Stott, Shaline V Fazal, Maria Andreasen, Kirsten Scott, & Roger A Barker

SUPPLEMENTAL FIGURES

SUPPLEMENTAL FIGURE 1.

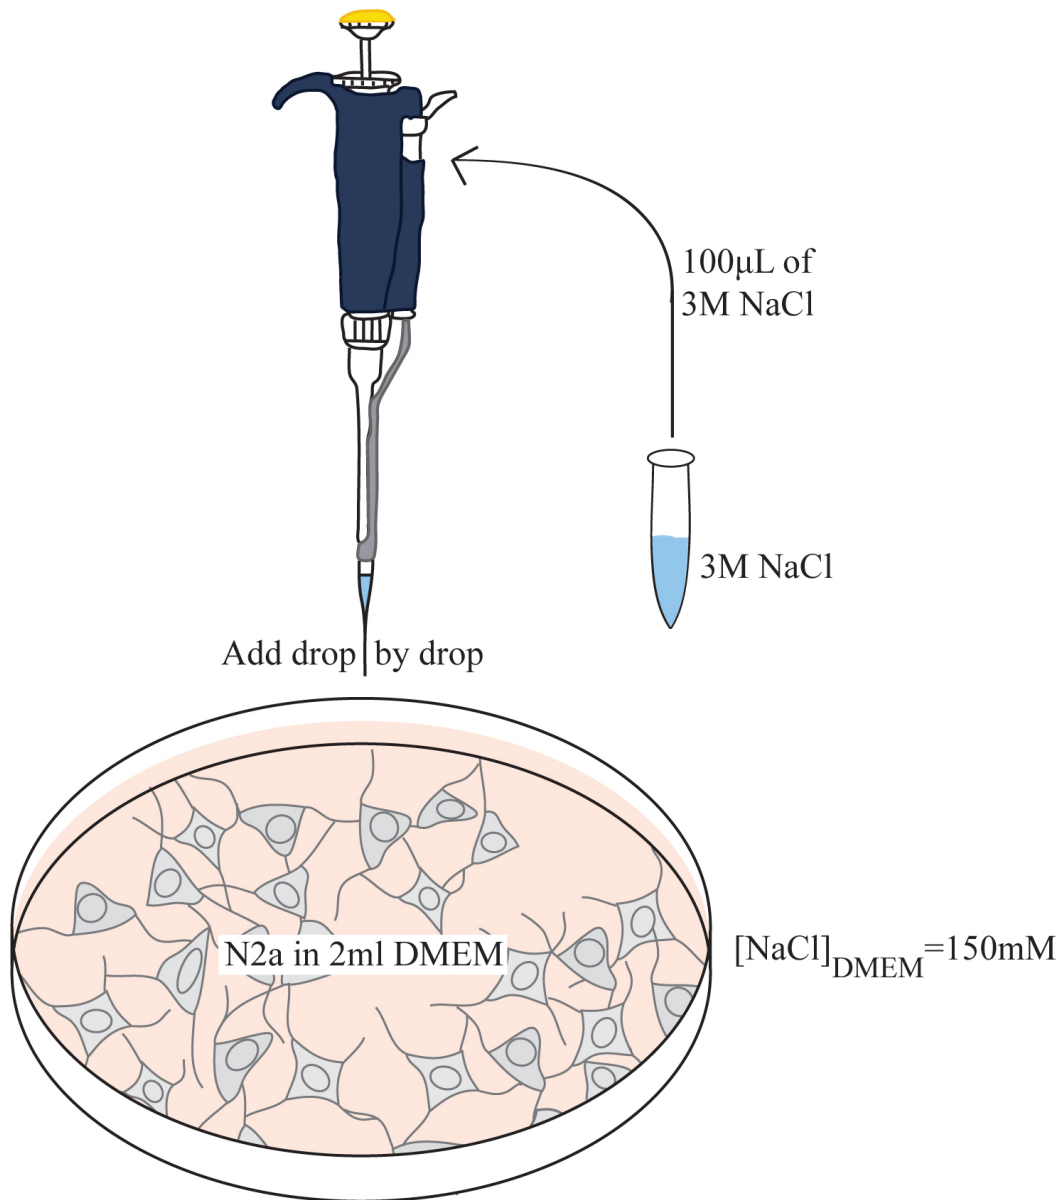

SUPPLEMENTAL FIGURE 2.

Hyperosmotic shock effect using HEK cells

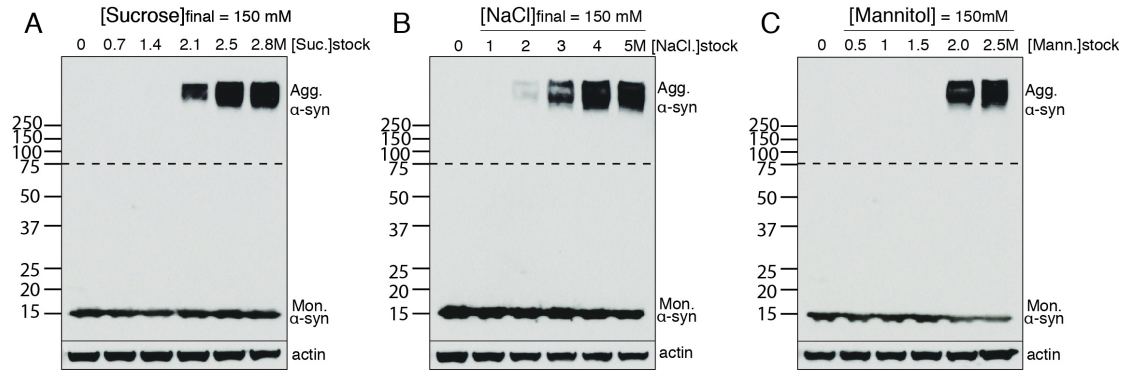

SUPPLEMENTAL FIGURE 3

The hyperosmotic shock induced aggregates are urea-resistant

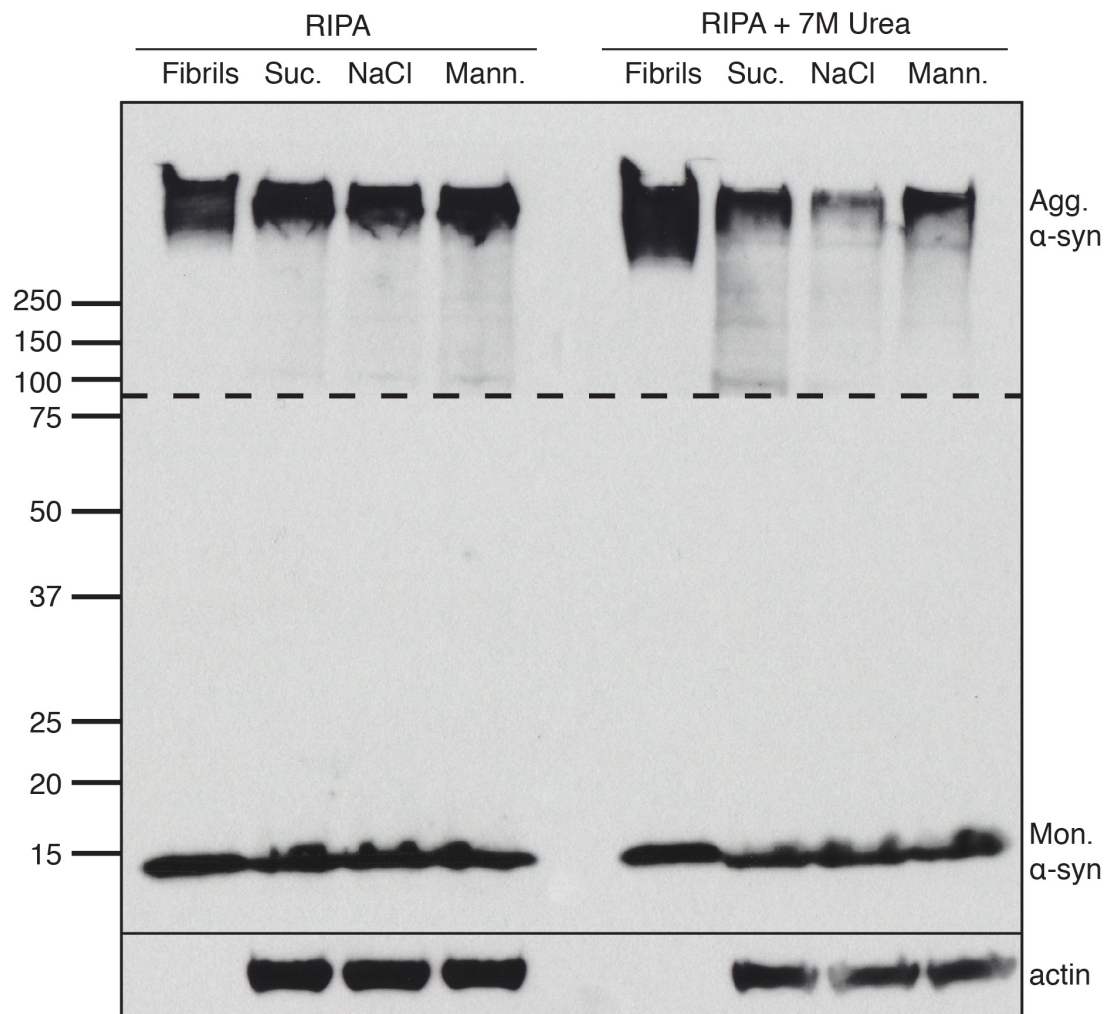

# SUPPLEMENTAL FIGURE 4

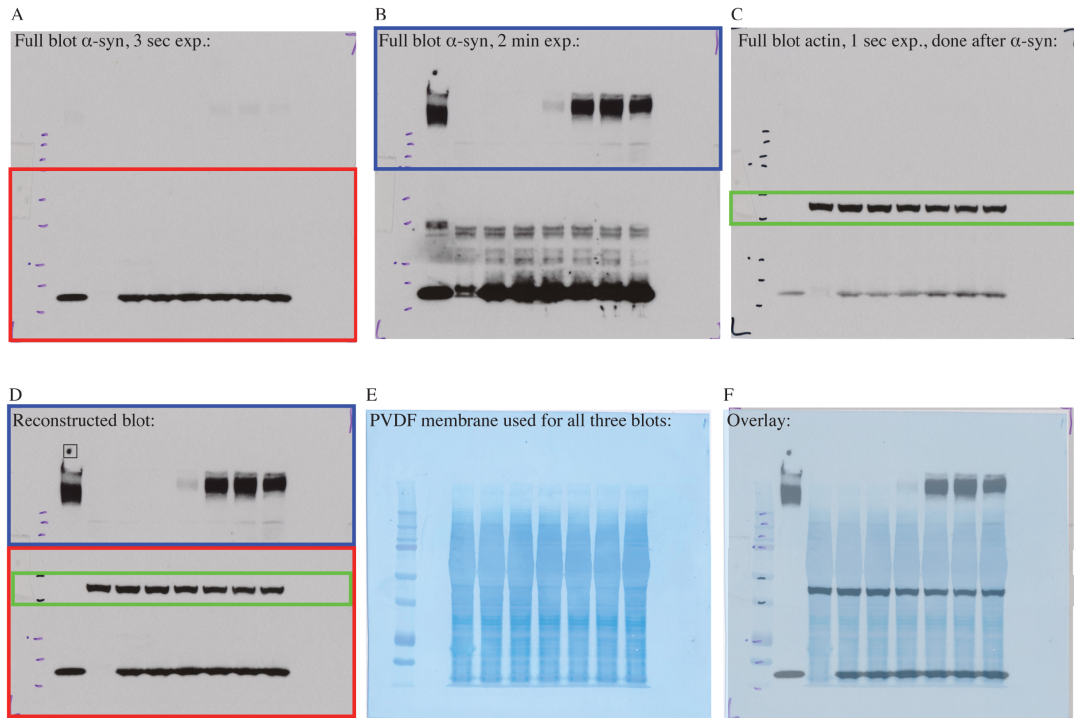

# SUPPLEMENTAL FIGURE 5

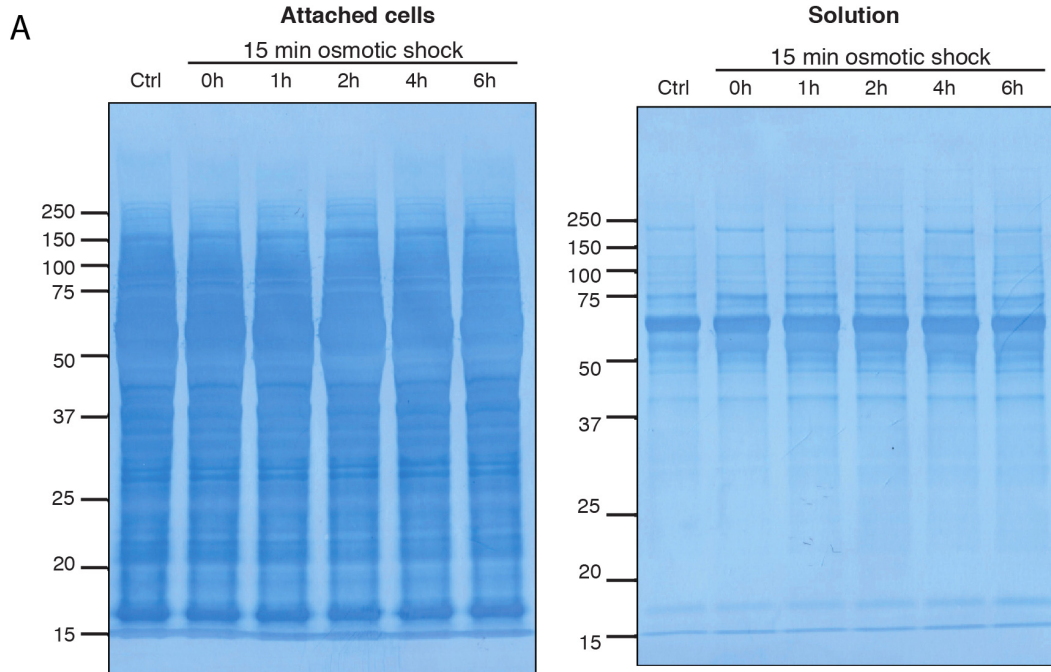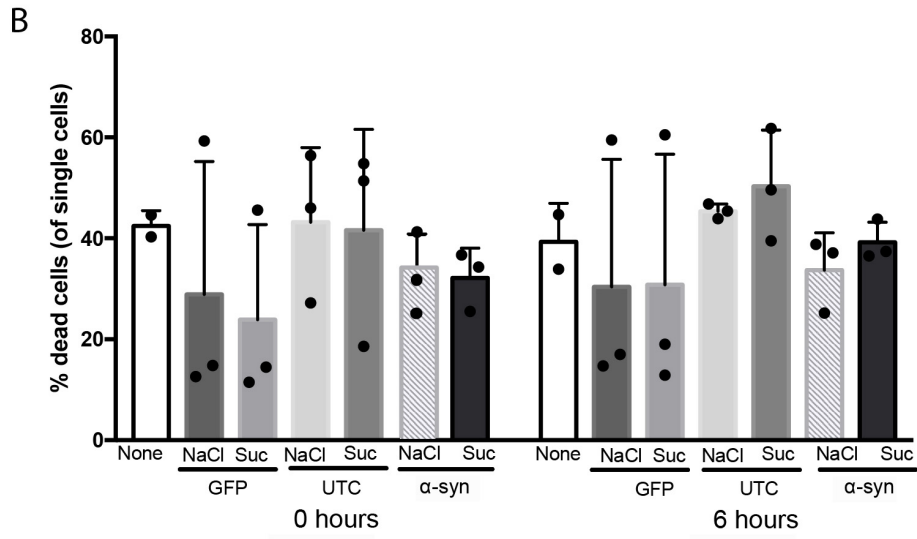

SUPPLEMENTAL FIGURE 6.

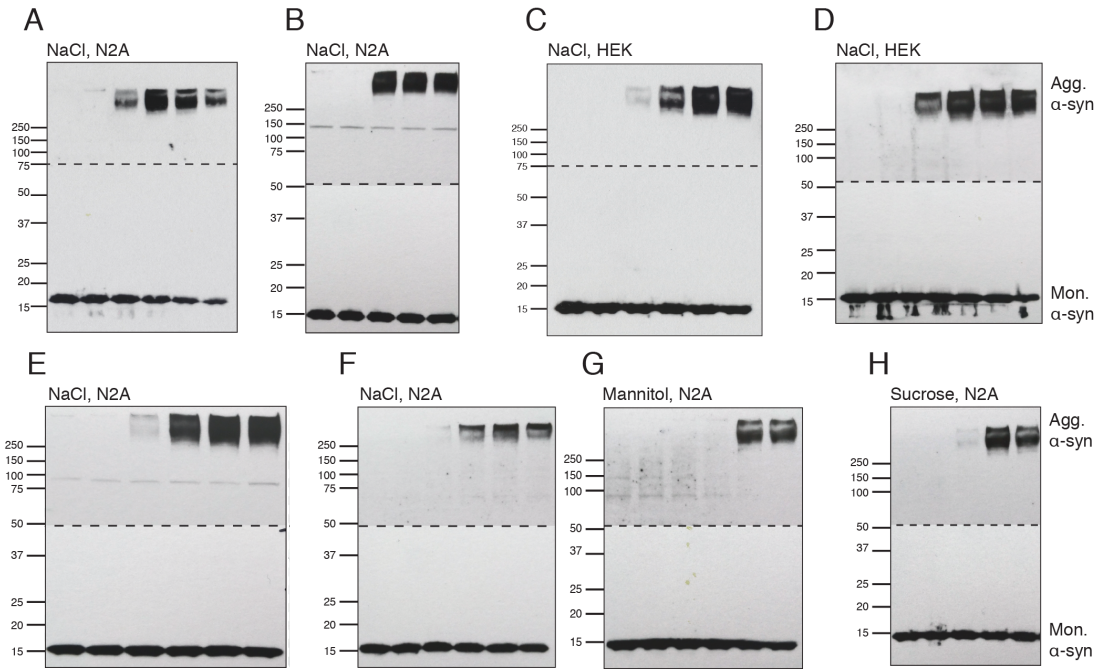

Supplement: 41598_2018_38296_MOESM1_ESM.pdf [file 41598_2018_38296_MOESM1_ESM.pdf]
